# Supplementary material for: Ethyl ester/acyl hydrazide-based aromatic sulfonamides: facile synthesis, structural characterization, electrochemical measurements and theoretical studies as effective corrosion inhibitors for mild steel in 1.0 M HCl
Source: Royal Society of Chemistry journal article supplement (doi:10.1039/d2ra05939h), 2022-12-20

## Supporting Information for

### An Ethyl Ester/Acyl Hydrazone-Based Aromatic Sulfonamide: Facile Synthesis, Structural Characterization, Electrochemical Measurements and Theoretical Studies as Effective Corrosion Inhibitors for Mild Steel in 1.0 M HCl

Mahmoud A. Bedair<sup>a,b</sup>, Ahmed M. Abuelela<sup>a,\*</sup>, Medhat Owda<sup>a</sup>, Essam M. Eliwa<sup>a</sup>

<sup>a</sup>Department of Chemistry, Faculty of Science (Men's Campus), Al-Azhar University, Nasr City 11884, Cairo, Egypt

<sup>b</sup>College of science and arts, University of Bisha, Al-Namas 61977, P.O. Box 101, Saudi Arabia.

**Table S1** Calculated NBOs densities of *p*-TSAH at expected inhibitor-metal interactions.

|                                                                                                                               |                                                                                                                                |
|-------------------------------------------------------------------------------------------------------------------------------|--------------------------------------------------------------------------------------------------------------------------------|
| <p>LP(1)C<sub>20</sub></p> 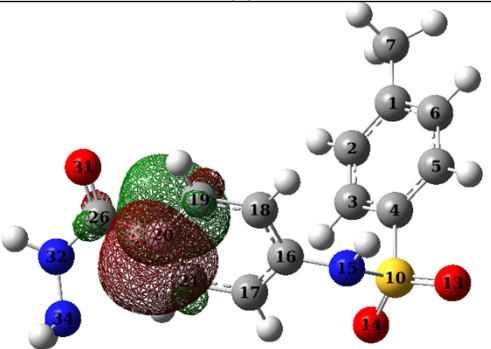                 | <p>LP(2)O<sub>31</sub></p>                  |
| <p>BD(2)C<sub>17</sub>-C<sub>21</sub></p>  | <p>BD(2)C<sub>18</sub>-C<sub>19</sub></p>  |
| <p>BD(2)C<sub>1</sub>-C<sub>6</sub></p>    | <p>BD(2)C<sub>2</sub>-C<sub>3</sub></p>    |
| <p>BD(2)C<sub>4</sub>-C<sub>5</sub></p>    | <p>LP(1)N<sub>32</sub></p>                 |

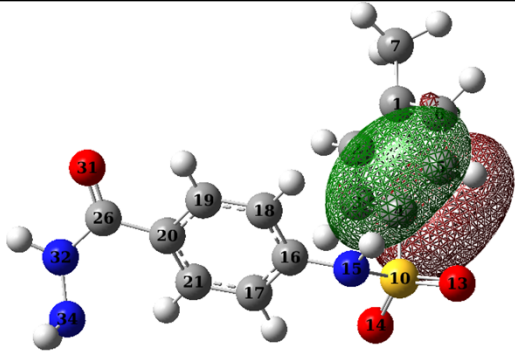

LP(2)O<sub>13</sub>

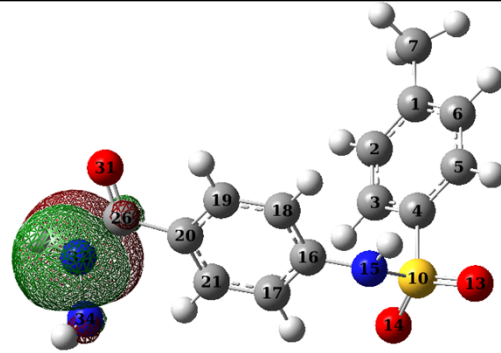

LP(3)O<sub>13</sub>

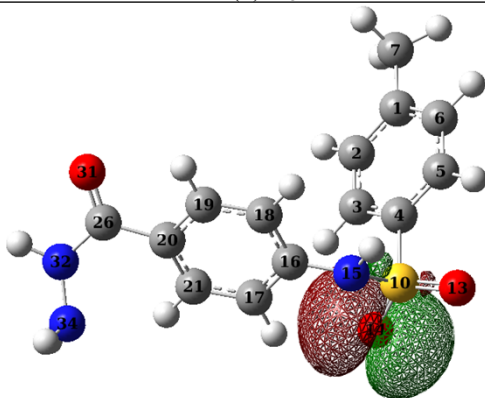

LP(3)O<sub>14</sub>

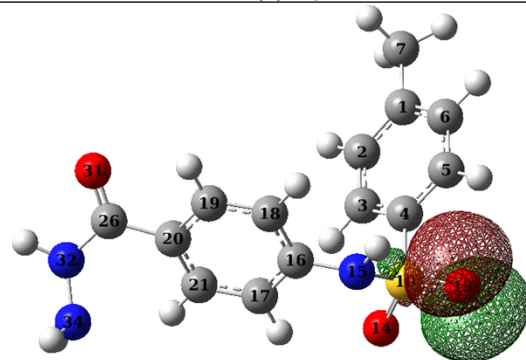

LP(2)O<sub>14</sub>

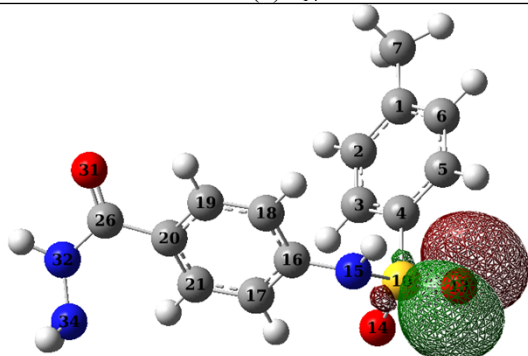

LP(1)N<sub>15</sub>

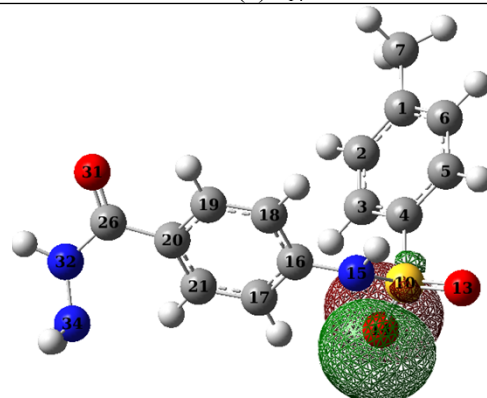

LP(1)N<sub>34</sub>

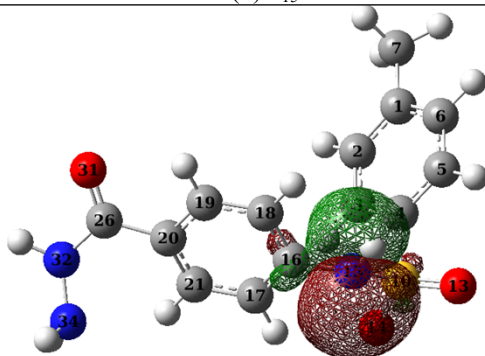

BD(2)C<sub>26</sub>-O<sub>31</sub>

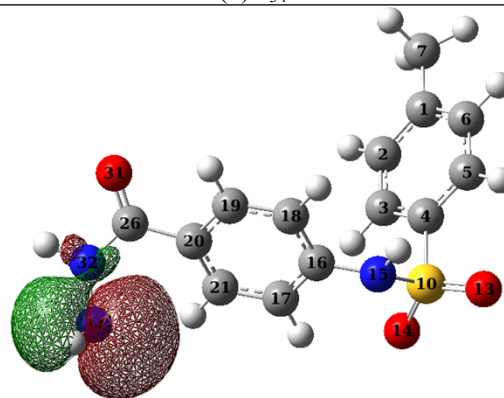

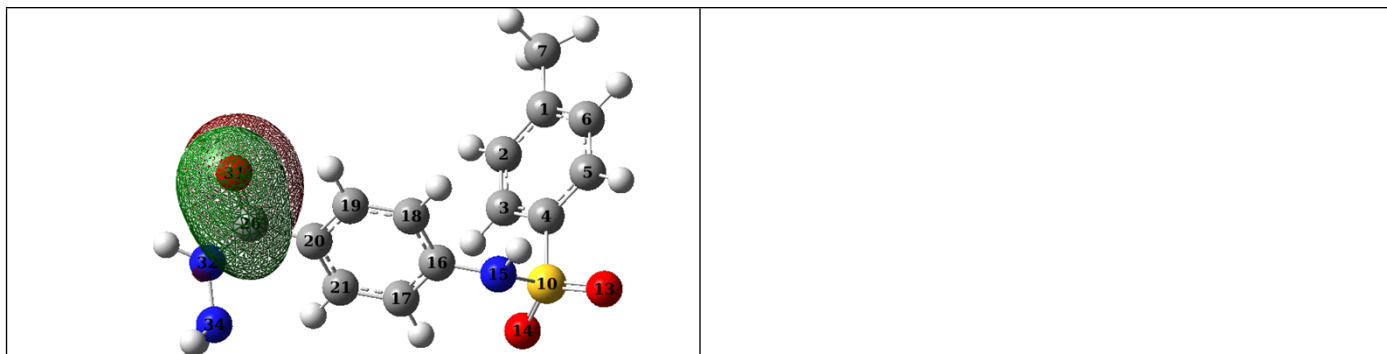

**Table S2** Calculated NBOs densities of *p*-TSAE at expected inhibitor-metal interactions.

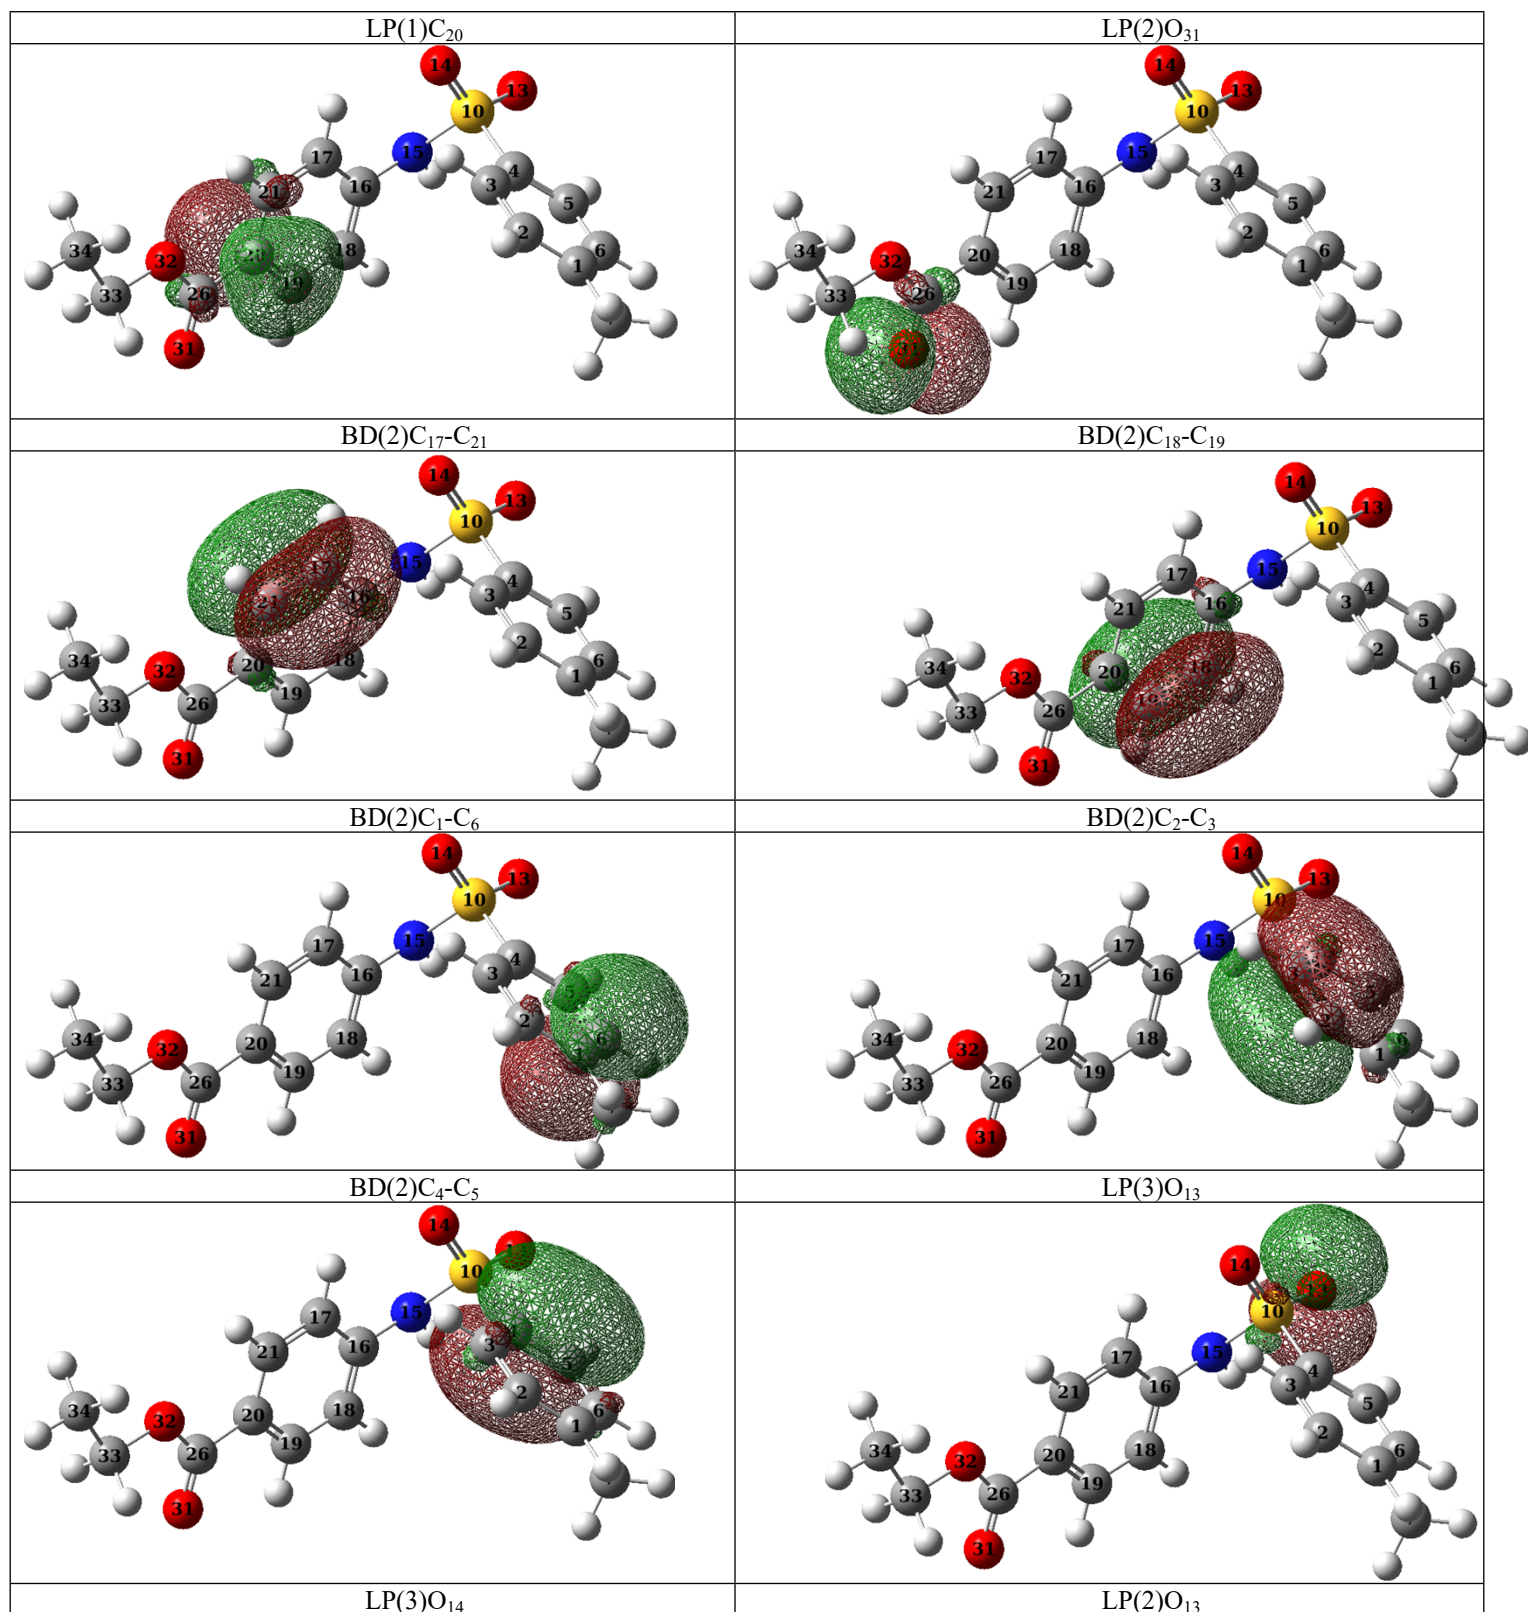



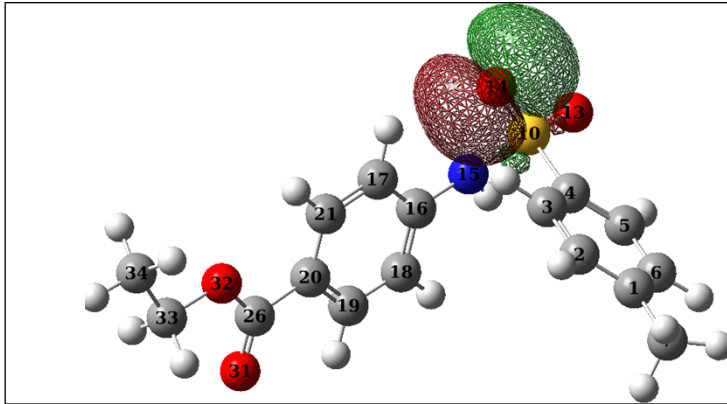

LP(2)O<sub>14</sub>

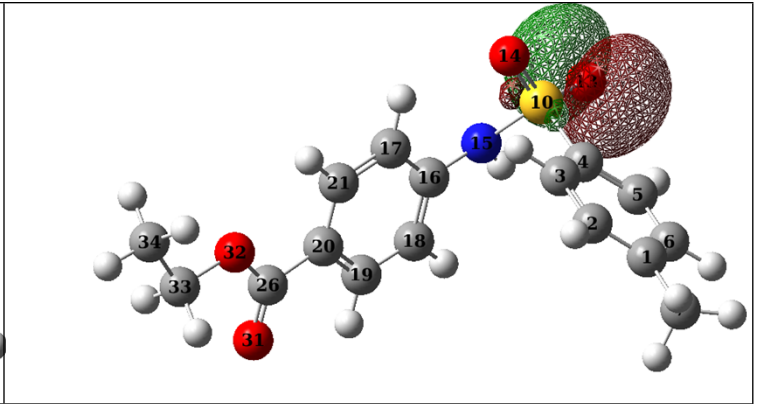

LP(1)N<sub>15</sub>

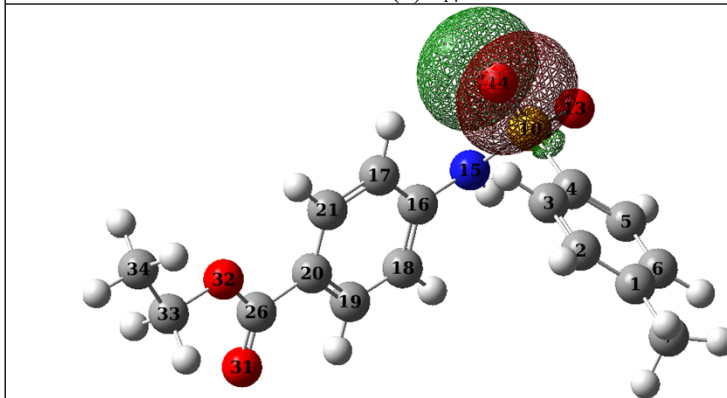

LP(2)O<sub>32</sub>

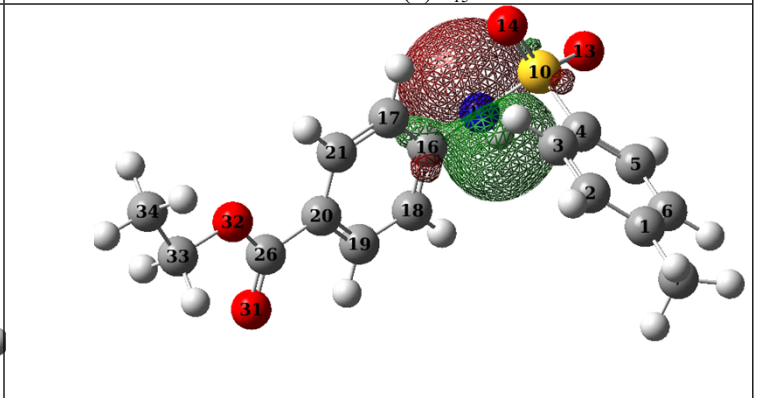

BD(2)C<sub>26</sub>-O<sub>31</sub>

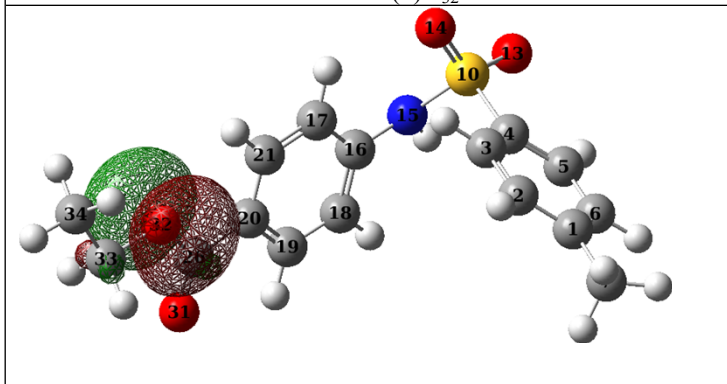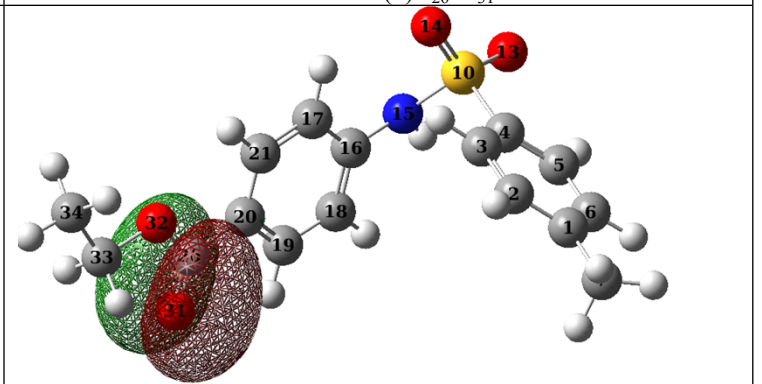

Supplement: d2ra05939h1.pdf [file d2ra05939h1.pdf]
